# Supplementary material for: Excellent electrocatalytic performance of metal-free thiophene–sulfur covalent organic frameworks for hydrogen evolution in alkaline medium
Source: Royal Society of Chemistry journal article supplement (doi:10.1039/d2ta00659f), 2022-01-01
Supplement: d2ta00659f2.pdf [file d2ta00659f2.pdf]

## Supporting Information

# Excellent Electrocatalytic Performance of Metal-free Thiophene-Sulfur Covalent Organic Framework for Hydrogen Evolution in Alkaline Medium

Yunchao Ma,<sup>a,1</sup> Yue Fu,<sup>a,1</sup> Wei Jiang<sup>b</sup>, Yuanyuan Wu<sup>b</sup>, Chunbo Liu,<sup>\*a,b</sup>, Guangbo Che<sup>\*c</sup>

and Qianrong Fang<sup>\*d</sup>

<sup>a</sup>Key Laboratory of Preparation and Application of Environmental Friendly Materials (Jilin Normal University), Ministry of Education, Changchun, 130103, P.R. China

<sup>b</sup>College of Environmental Science and Engineering, Jilin Normal University, Siping, 136000, P.R. China

<sup>c</sup>College of Chemistry, Baicheng Normal University, Baicheng, 137000, China

<sup>d</sup>State Key Laboratory of Inorganic Synthesis and Preparative Chemistry, Jilin University, Changchun 130012, China

## Table of contents

|                    |                                                                 |          |
|--------------------|-----------------------------------------------------------------|----------|
| <b>Section S1</b>  | Materials and characterization                                  | S3-S7    |
| <b>Section S2</b>  | PXRD patterns                                                   | S8       |
| <b>Section S3</b>  | TGA                                                             | S9       |
| <b>Section S4</b>  | Gas adsorption isotherms                                        | S10-S11  |
| <b>Section S5</b>  | Stability test                                                  | S12- S13 |
| <b>Section S6</b>  | Structure and composition of JLNU-COFs after HER stability test | S14      |
| <b>Section S7</b>  | Electrochemical performance                                     | S15- S25 |
| <b>Section S8</b>  | Unit cell parameters and fractional atomic coordinates          | S26- S27 |
| <b>Section S9</b>  | Comparison of HER performance with other electrocatalyst        | S28      |
| <b>Section S10</b> | References                                                      | S29- S30 |

## Section S1. Materials and characterization

### S1.1 Materials and instruments

All starting materials and solvents, unless otherwise noted, were obtained from J&K scientific LTD. 2,2'-bithiophenyl-5,5'-dicarbaldehyde (bTDC) were purchased from Shanghai Aladdin Biochemical Technology Co.. Fourier transform infrared (FT-IR) spectra were acquired on a Thermoscientific Nicolet 4700 Fourier Transform Infrared Spectrometer with KBr pellet. Thermogravimetric analysis (TGA) was recorded on a STA 449 F3 *Jupiter* thermal analyzer with N<sub>2</sub> flow rate of 20 mL min<sup>-1</sup> at a heating rate of 5 °C min<sup>-1</sup> to 800 °C. PXRD data were collected on a PANalytical B.V. Empyrean powder diffractometer using a Cu K $\alpha$  source ( $\lambda = 1.5418 \text{ \AA}$ ) over the range of  $2\theta = 2.0\text{--}40.0^\circ$  with a step size of  $0.02^\circ$  and 2 s per step. The sorption isotherm for N<sub>2</sub> was measured by using a Micromeritics ASAP 2460 analyzer with ultra-high-purity gas (99.999% purity). To estimate the pore size distributions, nonlocal density functional theory (NLDFT) was applied to analyze the N<sub>2</sub> isotherm on the basis of the model of N<sub>2</sub>@77K on carbon with slit pores and the method of non-negative regularization. The SEM images were obtained on JEOL 8100 scanning electron microscope. X-ray photoelectron spectroscopy (XPS) was obtained by Escalab 250XI X-ray electron spectrometer (VG Scientific, America).

### S1.2 Electrochemical measurements

The electrocatalytic properties of the catalysts for hydrogen evolution reaction were evaluated with a three-electrode configuration on a CHI 760E electrochemical workstation (CHI Instruments, Shanghai, China). To prepare the working electrode, 2 mg of the electrocatalyst combined with 600  $\mu\text{L}$  of ethanol and 4  $\mu\text{L}$  of Nafion was treated by ultrasonication for 20 min; then, the as-prepared suspension (12  $\mu\text{L}$ , corresponding to a mass loading of  $0.57 \text{ mg cm}^{-2}$ ) was slowly deposited on glassy carbon (GC, 3 mm diameter) electrode. After continuous purging with N<sub>2</sub> to remove dissolved gases, 1.0 M KOH, 0.5 M H<sub>2</sub>SO<sub>4</sub> and 1.0 M PBS solutions were used as alkaline, acidic and neutral electrolytes, respectively. The as-prepared sample was directly used as the working electrode. Hg/HgO and graphite rods were used as reference and counter electrodes in 1.0 M KOH and 1.0 M PBS solutions. Potential measurements were all converted to potential

values relative to the reversible hydrogen electrode (RHE) based on  $E_{(vs. RHE)} = E_{(vs. Hg/HgO)} + 0.0591 \cdot pH + 0.098$ . While Saturated Ag/AgCl in 0.5 M  $H_2SO_4$  was used as the reference electrode, Pt filaments were used as counter electrodes. the potentials were corrected to the reversible hydrogen electrode (RHE) in accordance  $E_{(vs. RHE)} = E_{(vs. Ag/AgCl)} + 0.059 \cdot pH + 0.197$ . LSV curves were obtained in a nitrogen-saturated electrolyte at a sweep rate of 10 mV/s. The ohmic potential drop (iR) losses that arise from the solution resistance were all corrected. The EIS was tested in the constant potential mode in the frequency range 1 Hz to 100 kHz. Cyclic voltammetry (CV) curves of the samples in different electrolytes were tested at different scan rates (20, 40, 60, 80 and 100 mV/s) and further calculated to obtain the bilayer capacitance value  $C_{dl}$ .

### S1.3 The HER reaction process

In alkaline medium, the HER reaction process is assigned to the Volmer-Heyrovsky pathway<sup>[1,2]</sup>.

Electrochemical reaction step:

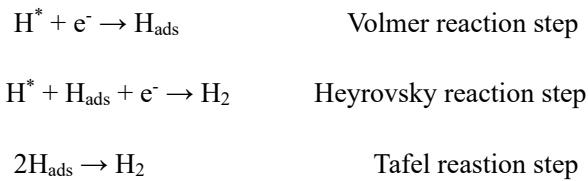

Where  $H^*$  represents the catalytic site with an adsorbed H-species.

### S1.4 The Tafel equation is presented as:

$$\eta = a + b \log(i/i_0)$$

$\eta$  is the overpotential,  $i$  is current density,  $i_0$  is the exchange current density,  $b$  is the Tafel slope and  $a$  is the constant term.

### S1.5 The HER reaction rate-limiting step

In these multi-step reactions, the Tafel slope is  $b = 2.303 RT/\alpha F$ , where  $b$  is the Tafel slope (V),  $R$  the gas constant ( $J K^{-1} mol^{-1}$ ),  $T$  temperature (K),  $\alpha$  the transfer coefficient (independent of temperature) and  $F$  is the Faraday constant ( $C mol^{-1}$ ). The Tafel slope plays an important role in demonstrating the mechanism when the mechanism is the rate-determining step (rds) of a

multi-step reaction<sup>[3]</sup>. The widely accepted view is that it has been widely accepted that the value of the charge-transfer coefficient, depends on the rds for multi-step reactions.

When the rds is Volmer step or Volmer step + Heyrovsky step or Volmer step + Tafel step, the value of  $\alpha = 0.5$ , the Tafel slope becomes  $118 \text{ mV dec}^{-1}$  at 298 K calculated from  $b = 2.303 RT/\alpha F$ . Other possibilities are  $\alpha = 1.5$  and  $b = 40 \text{ mV}$  when the Heyrovsky step is the rds, and  $\alpha = 2$  and  $b = 30 \text{ mV}$  when the Tafel step is the rds<sup>[4]</sup>. Therefore, the Tafel slopes and the  $\alpha$  values are  $b = 131 \text{ mV}$  and  $\alpha = 0.45$  for the JLNU-301 electrode,  $b = 113 \text{ mV}$  and  $\alpha = 0.52$  for the JLNU-302 electrode.

### S1.6 Electrochemical active surface area (ECSA) calculation:

The double layer capacitance ( $C_{dl}$ ) was evaluated according to the following equation:  $C_{dl} = \Delta j/v$ , which  $\Delta j$  is the current density difference between anode and cathode at the potential corresponding to 0.25 V and  $v$  is the scan rate. The slope of the line plots corresponds to the double of  $C_{dl}$ . Subsequently, the ECSA was estimated from the  $C_{dl}$  according to  $ECSA = C_{dl}/C_s$ , which  $C_s$  is the specific capacitance.

### S1.7 Faraday efficiency calculation:

The Faraday efficiency calculation:  $FE\% = \frac{\text{(Amount of H}_2 \text{ generated experimentally)}}{\text{(Amount of H}_2 \text{ generated theoretically)}} = \frac{nNF}{Q} \times 100\%$

Where  $n$  equals to 2,  $N$  is the number of hydrogen produced during the experiment (mol) and  $Q$  is the total charge passed through the reaction.

### S1.8 Synthesis of JLUN-301

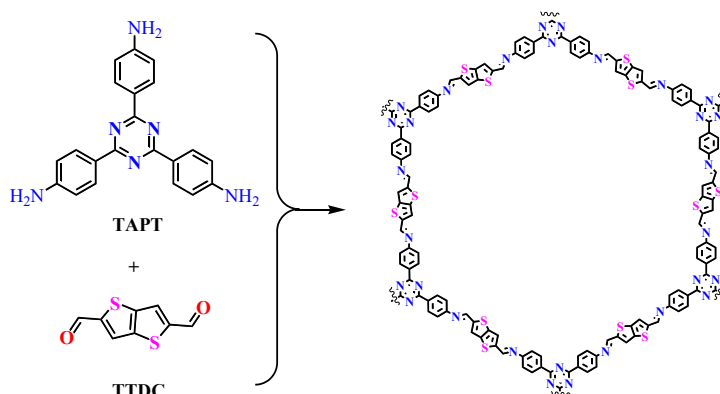

2,4,6-tris(4-aminophenyl)-1,3,5-triazine (TAPT) (0.04 mmol, 14.18 mg) and Thieno[3,2-b]thiophene-2,5-dicarboxaldehyde (TTDC) (0.06 mmol, 11.78 mg) were weighted into a Pyrex tube (volume: *ca* 20 ml with a both length of 10 cm, neck length of 9 cm) and to the mixture was added mesitylene (0.75 ml), 1,4-dioxane(0.25 ml) and 0.1 ml of aqueous acetic acid (6.0 mol/L). The tube was flash frozen at 77 K (LN<sub>2</sub> bath), evacuated to an internal pressure of 0.15 mmHg and flame sealed. Upon sealing the length of the tube was reduced to *ca.* 13 cm. The reaction mixture was heated at 120 °C for 72 h to afford a orange precipitate which was isolated by filtration over a medium glass frit and washed with anhydrous acetone (3 × 20 ml). The yield is about 74.0% (19.2 mg). The solvent was removed under vacuum at 80 °C to afford the corresponding products as orange powder of JLNU-301. Anal. Calcd for C<sub>66</sub>H<sub>36</sub>N<sub>12</sub>S<sub>6</sub>: C: 66.67; H: 3.03; N:14.14; S: 16.16. Found: C:66.58; H: 3.11; N: 14.08; S: 16.23. Solid-state <sup>13</sup>C NMR (500MHz): 13.11, 18.38, 57.96, 106.75, 114.99, 129.14, 133.99, 142.79, 150.81, 169.07 ppm. FT-IR (KBr): 810, 880, 1052, 1092, 1460, 1578, 1613, 2968, 3398 cm<sup>-1</sup>.

### S1.9 Synthesis of JLUN-302

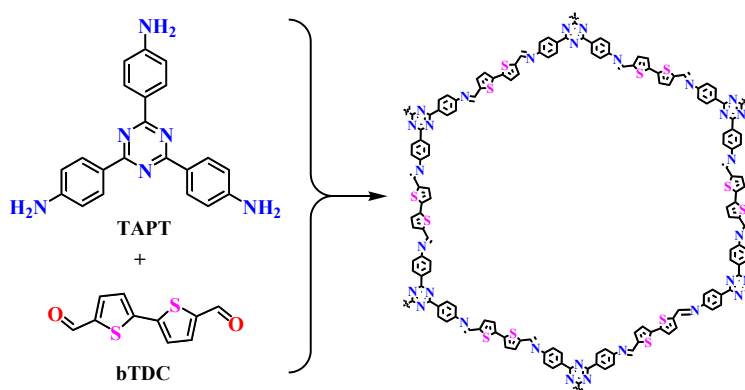

In a similar procedure of JLNU-301, 2,4,6-tris(4-aminophenyl)-1,3,5-triazine (TAPT) (0.03 mmol, 10.63 mg) and 2,2'-dithiophene-5,5'-dicarboxaldehyde (bTDC) (0.045 mmol, 10.00 mg) were weighted into a Pyrex tube (volume: *ca* 20 ml with a both length of 10 cm, neck length of 9 cm) and to the mixture was added butanol (1 ml) and 0.1 ml of aqueous acetic acid (6.0 mol/L). The tube was flash frozen at 77 K (LN<sub>2</sub> bath), evacuated to an internal pressure of 0.15 mmHg and flame sealed. Upon sealing the length of the tube was reduced to *ca.* 13 cm. The reaction mixture was heated at 120 °C for 72 h to afford a orange precipitate which was isolated by filtration over a

medium glass frit and washed with anhydrous acetone ( $3 \times 20$  ml). The yield is about 72.3% (15.2 mg). The solvent was removed under vacuum at 80 °C to afford the corresponding products as red powder for JLNU-302. Anal. Calcd for  $C_{72}H_{42}N_{12}S_6$ : C: 68.25; H: 3.32; N: 13.27; S: 15.16. Found: C: 68.31; H: 3.27; N: 13.25; S: 15.17. Solid-state  $^{13}C$  NMR (500MHz): 18.71, 25.67, 33.58, 114.37, 117.27, 130.46, 133.89, 142.59, 152.07, 170.04, 182.31 ppm. FT-IR (KBr): 806, 868, 1048, 1362, 1502, 1574, 1613, 2324, 3680  $cm^{-1}$ .

## Section S2: PXRD patterns

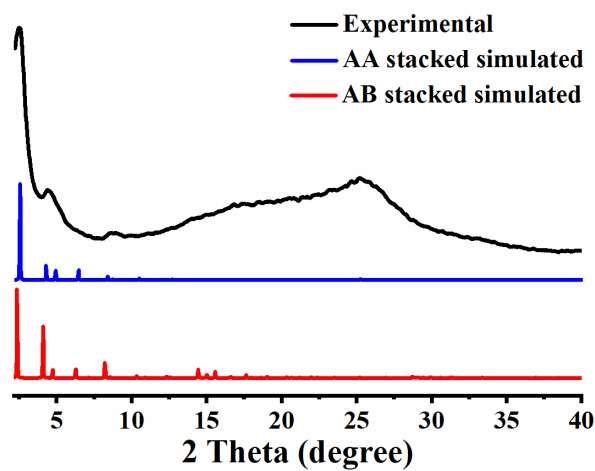

**Figure S1.** Comparison of PXRD patterns for JLNU-301: calculated based on the AA stacked (blue), AB stacked (red), and experiment (black).

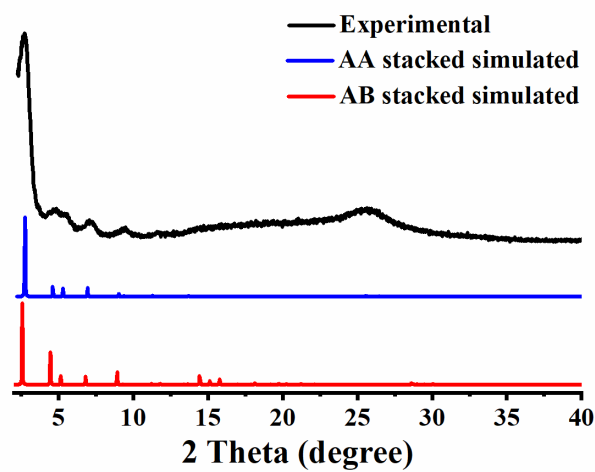

**Figure S2.** Comparison of PXRD patterns for JLNU-302: calculated based on the AA stacked (blue), AB stacked (red), and experiment (black).



### Section S3: TGA

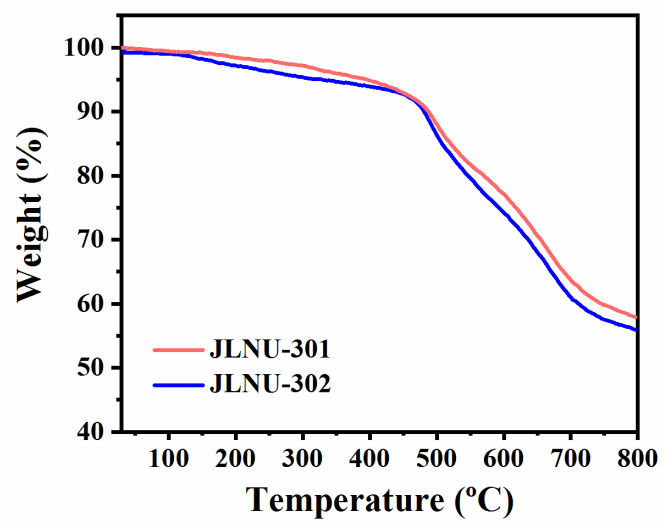

**Figure S3.** TGA curves of JLNU-301 and JLNU-302 in N<sub>2</sub> atmosphere.

## Section S4: Gas adsorption isotherms

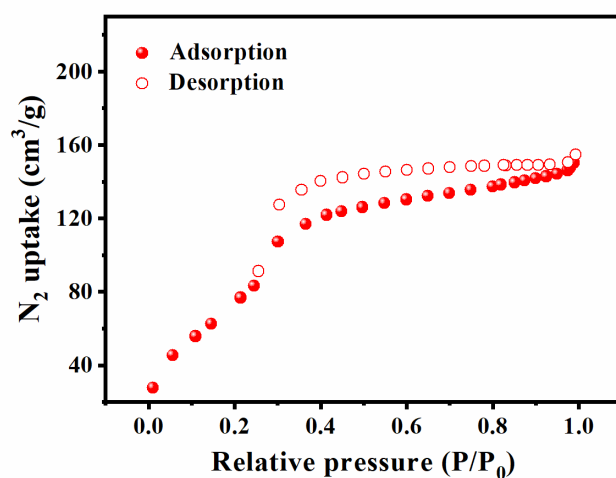

Figure S4.  $N_2$  adsorption-desorption isotherms of JLNU-301.

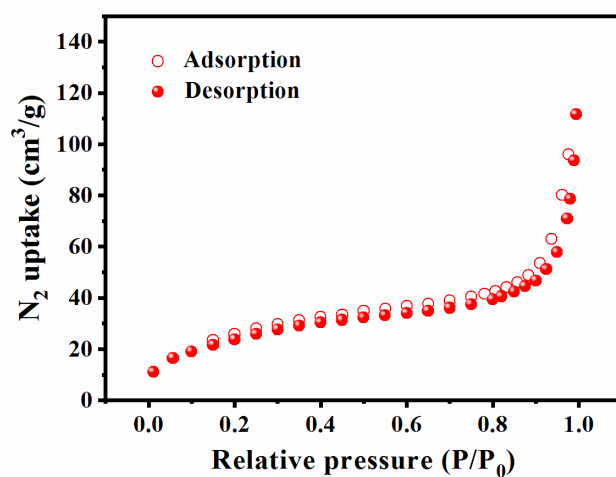

Figure S5.  $N_2$  adsorption-desorption isotherms of JLNU-302.

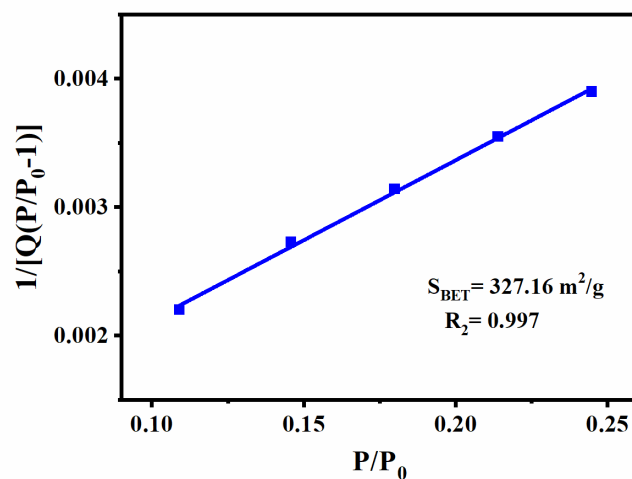

Figure S6. BET pole of JLNU-301 calculated from  $N_2$  adsorption isotherm at 77 K.

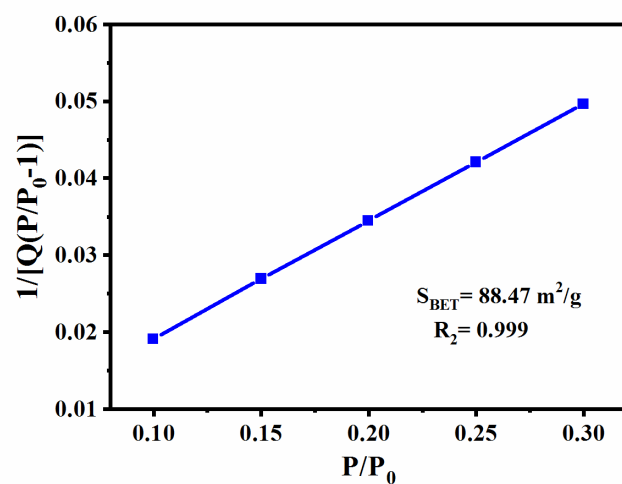

Figure S7. BET pole of JLNU-302 calculated from N<sub>2</sub> adsorption isotherm at 77 K.

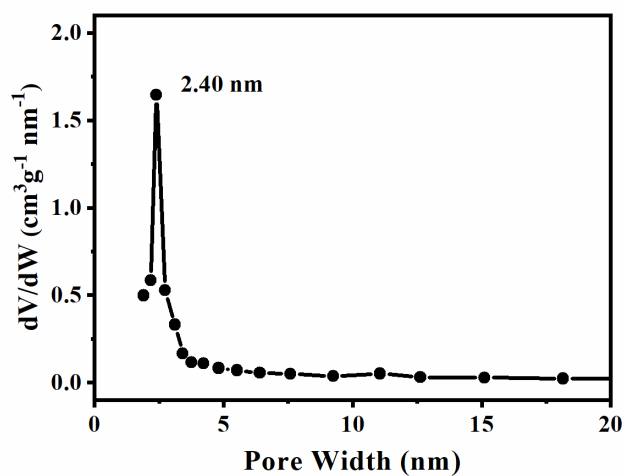

Figure S8. The pore size distribution curve of JLNU-301.

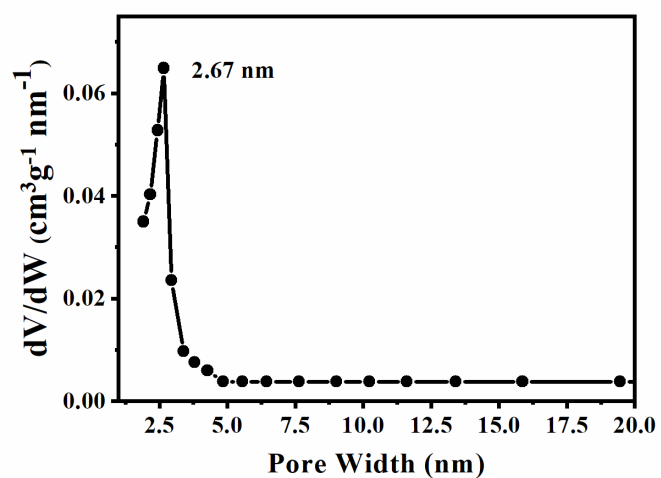

Figure S9. The pore size distribution curve of JLNU-302.

## Section S5: Stability test

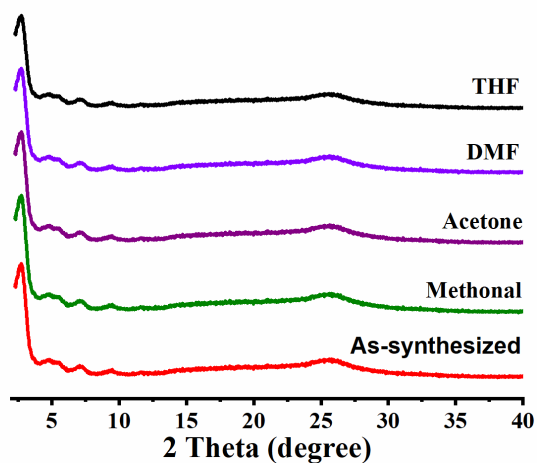

Figure S10. PXRD patterns of JLNU-301 after 3 d treatment in different organic solvents.

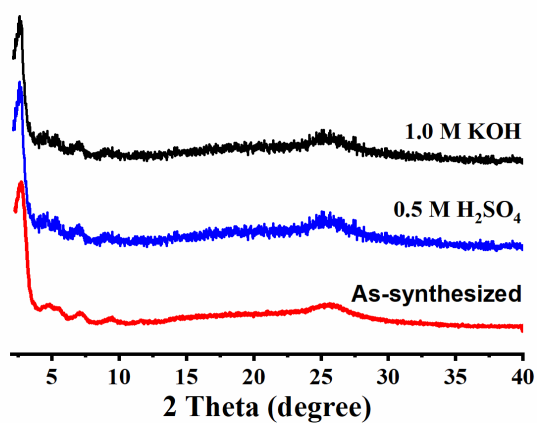

Figure S11. PXRD patterns of JLNU-301 after 3 d treatment in acid/base aqueous solutions.

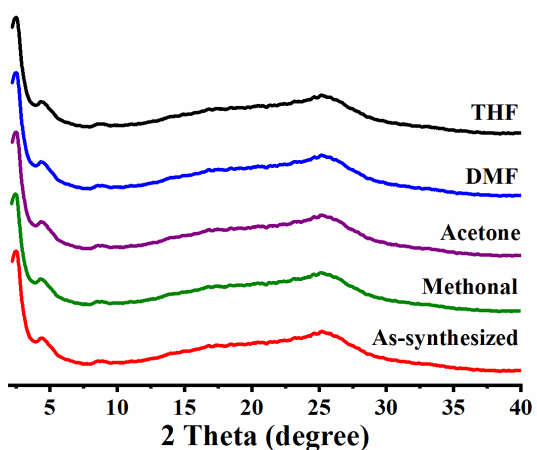

Figure S12. PXRD patterns of JLNU-302 after 3 d treatment in different organic solvents.

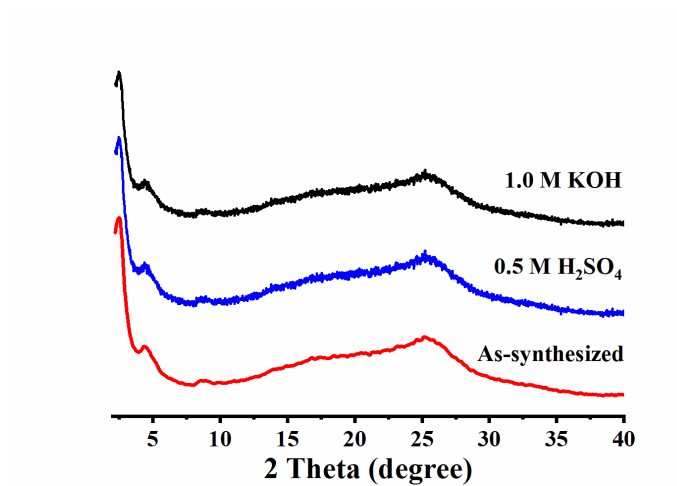

**Figure S13.** PXRD patterns of JLNU-302 after 3 d treatment in acid/base aqueous solutions.

## Section S6: Structure and composition of JLNU-COFs after HER stability test

### stability test

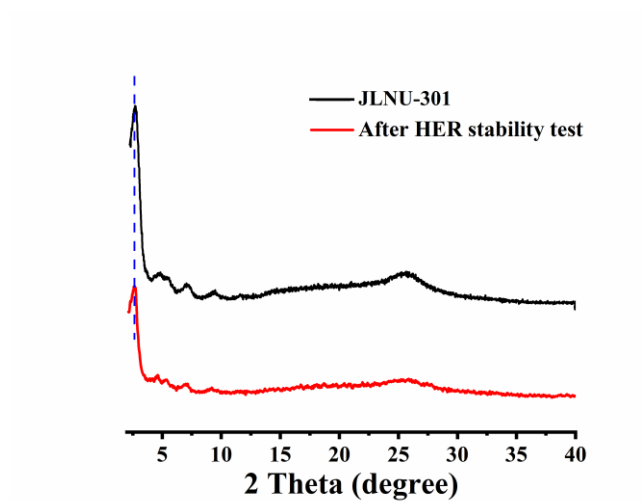

Figure S14. PXRD of JLNU-301 before and after 20 hours of HER stability test.

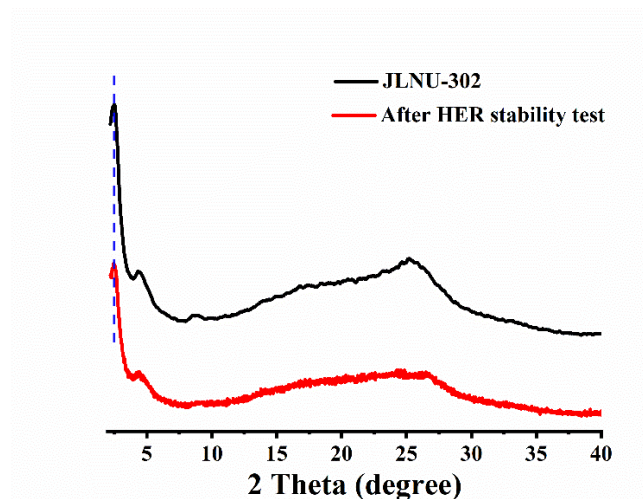

Figure S15. PXRD of JLNU-302 before and after 20 hours of HER stability test.

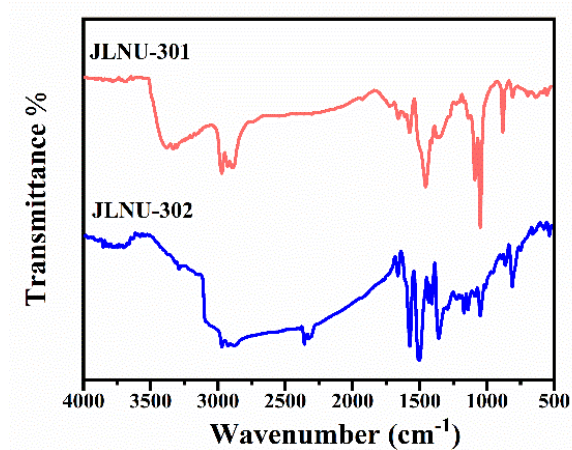

Figure S16. FT-IR of JLNU-COFs before and after 20 hours of HER stability test.

## Section S7: Electrochemical performance

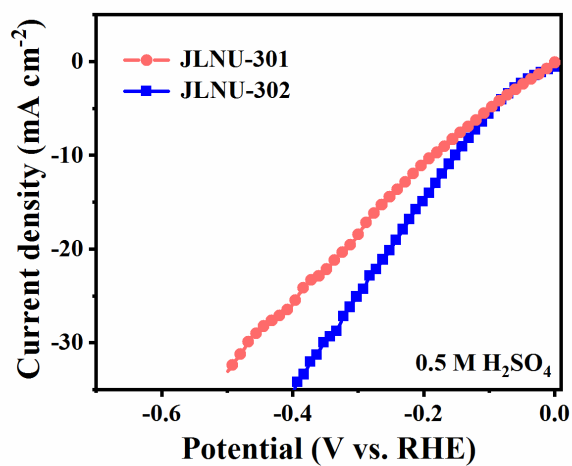

Figure S17. Polarization curves of JLNU-301 and JLNU-302 in 0.5 M H<sub>2</sub>SO<sub>4</sub>.

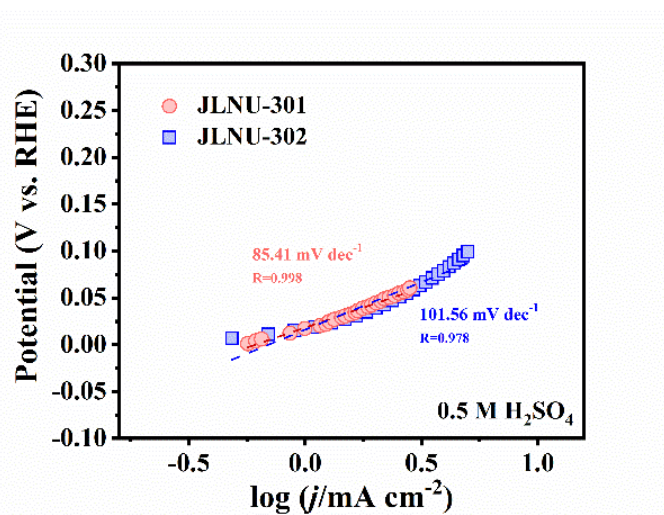

Figure S18. Tafel plots of JLNU-301 and JLNU-302 in 0.5 M H<sub>2</sub>SO<sub>4</sub>.

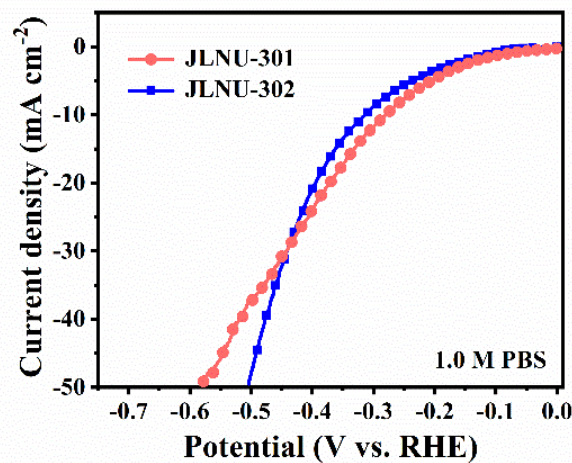

Figure S19. Polarization curves of JLNU-301 and JLNU-302 in 1.0 M PBS.

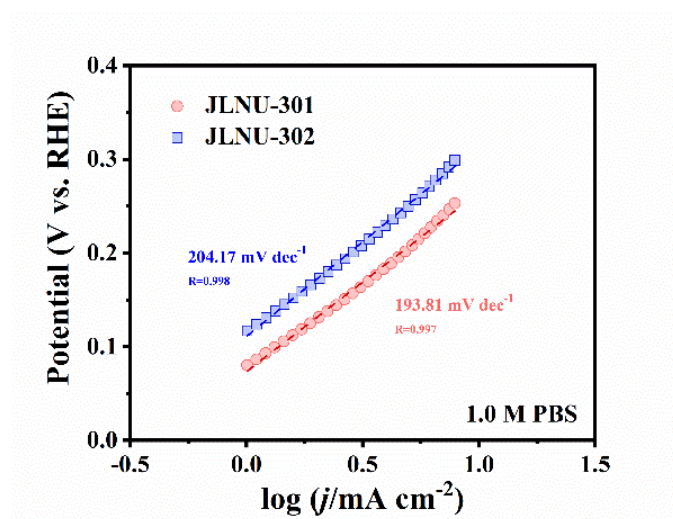

**Figure S20.** Tafel plots of JLNU-301 and JLNU-302 in 1.0 M PBS.

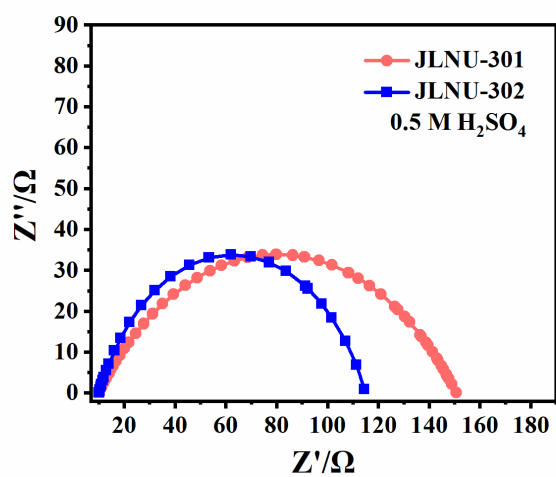

**Figure S21.** The Nyquist plots of JLNU-301 and JLNU-302 at 0.5 M H<sub>2</sub>SO<sub>4</sub>.

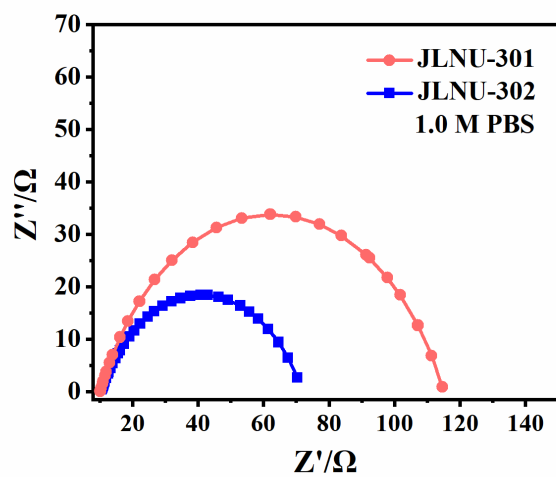

**Figure S22.** The Nyquist plots of JLNU-301 and JLNU-302 at 1.0 M PBS.



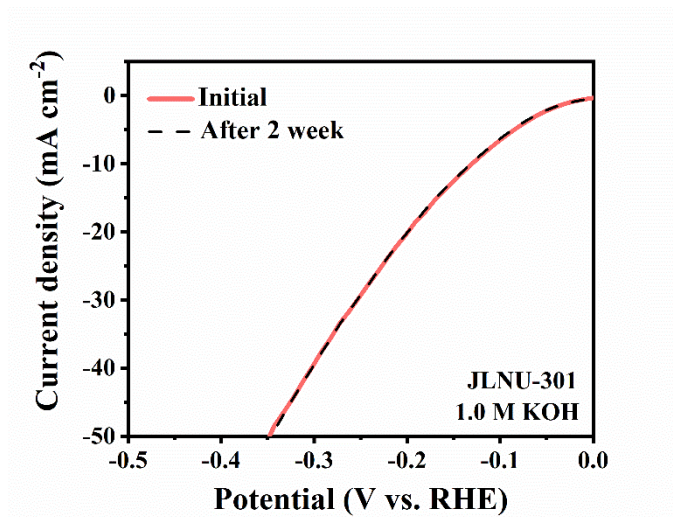

Figure S23. The LSV curves of JLNU-301 before and after 2-week tests.

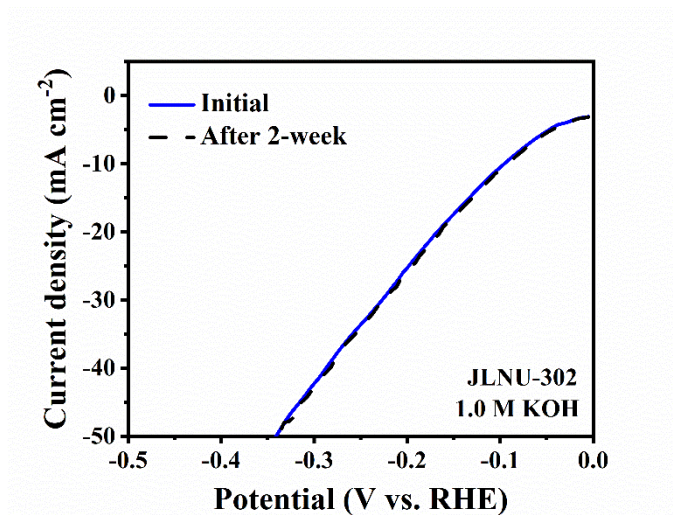

Figure S24. The LSV curves of JLNU-302 before and after 2-week tests.

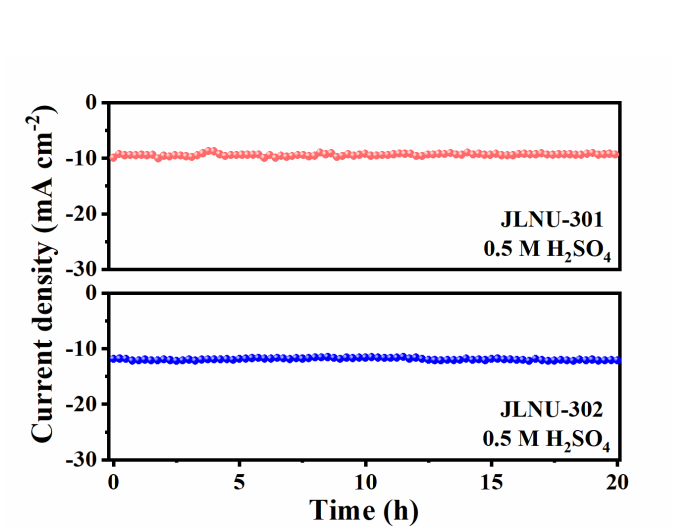

Figure S25. Chronopotentiometry plot for JLNU-301 and JLNU-302 in 0.5 H<sub>2</sub>SO<sub>4</sub>.

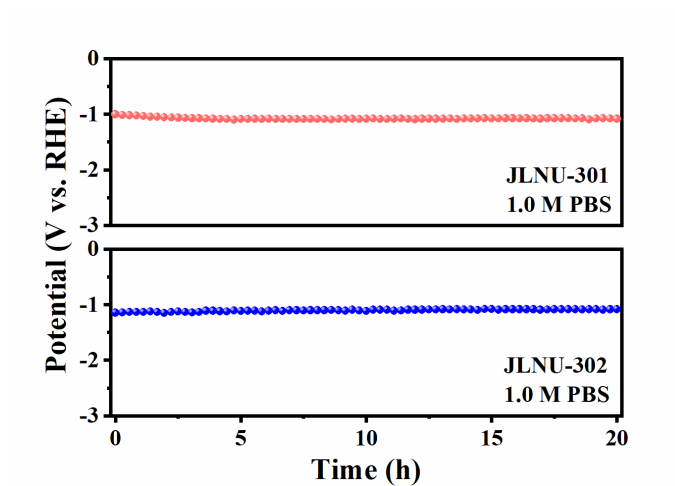

**Figure S26.** Chronopotentiometry plot for JLNU-301 and JLNU-302 in 1.0 M PBS.

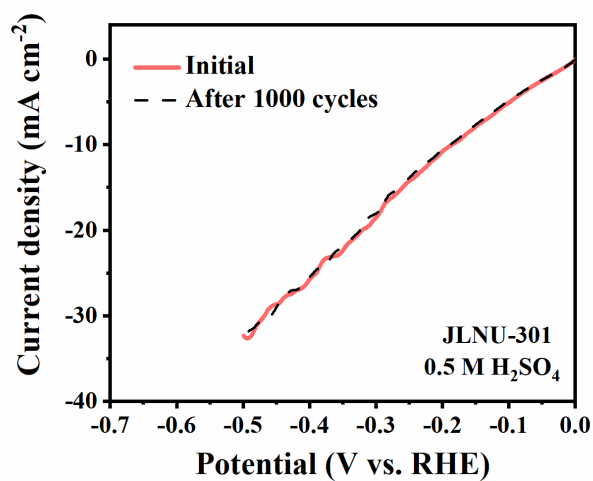

**Figure S27.** The LSV curves of JLNU-301 before and after 1000 CV tests.

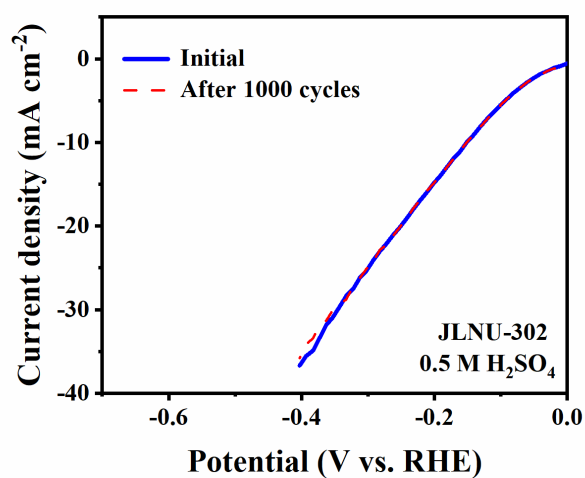

**Figure S28.** LSV curves of JLNU-302 before and after 1000 CV tests.

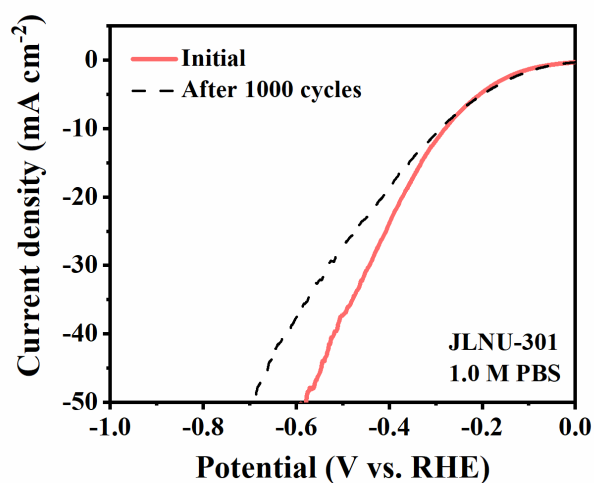

Figure S29. LSV curves of JLNU-301 before and after 1000 CV tests.

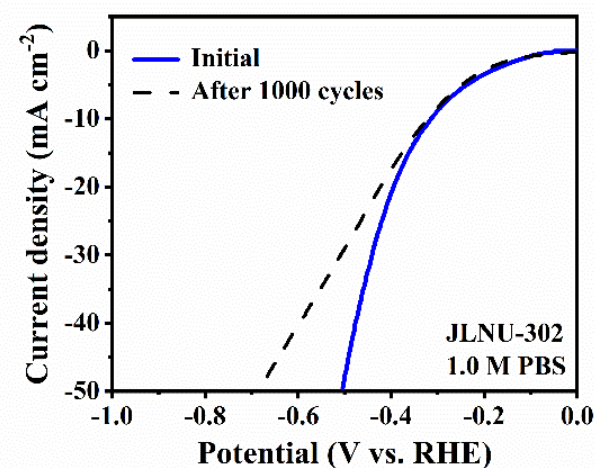

Figure S30. LSV curves of JLNU-302 before and after 1000 CV tests.

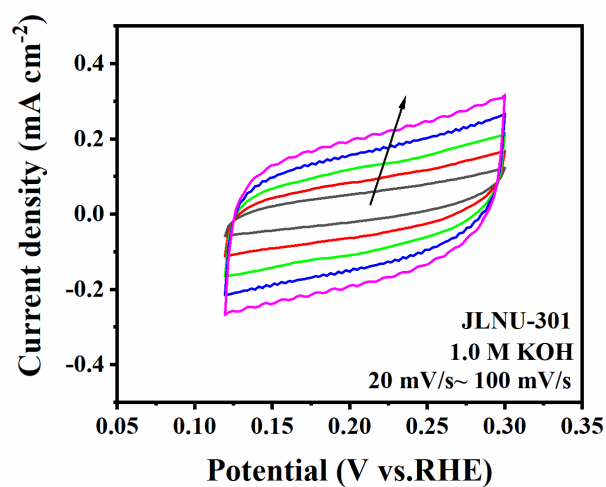

Figure S31. CV curves of JLNU-301 at different scan rates.

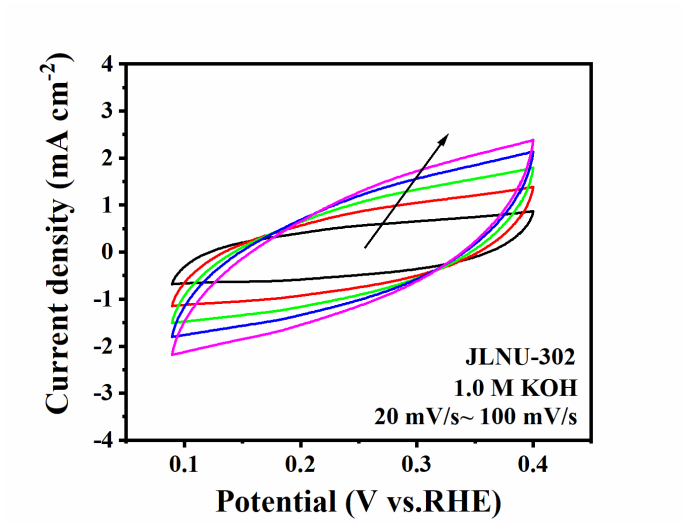

**Figure S32.** CV curves of JLNU-302 at different scan rates.

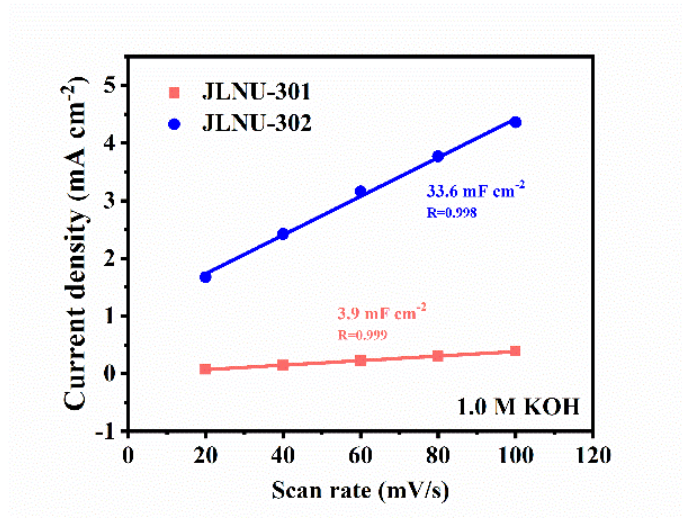

**Figure S33.** The  $C_{dl}$  plots for JLNU-301, and JLNU-302 at 1.0 M KOH.

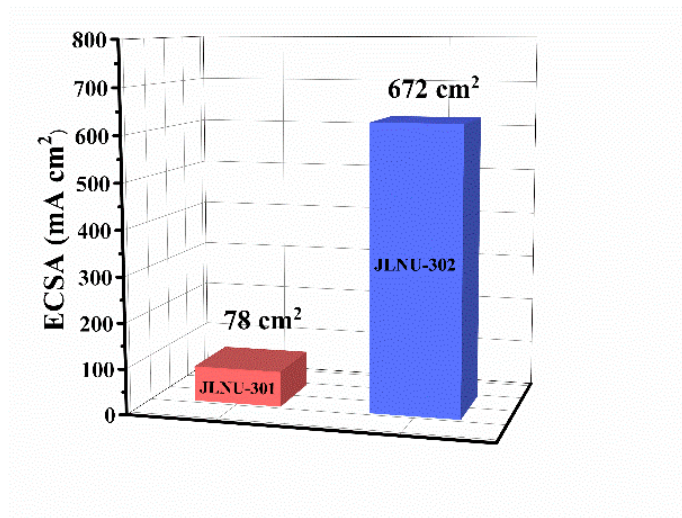

**Figure S34.** The ECSA for JLNU-301, and JLNU-302 in 1.0 M KOH.

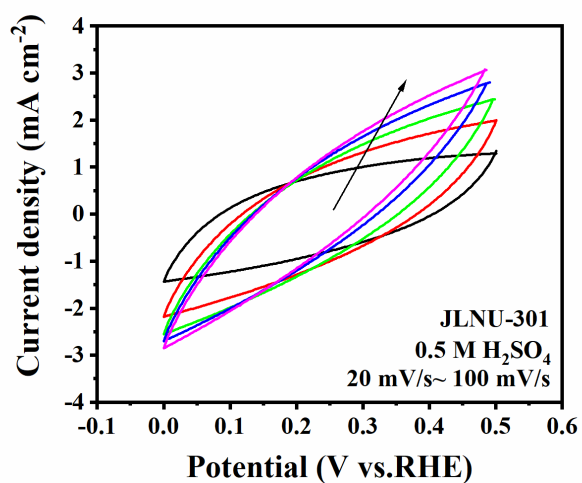

Figure S35. CV curves of JLNU-301 at different scan rates.

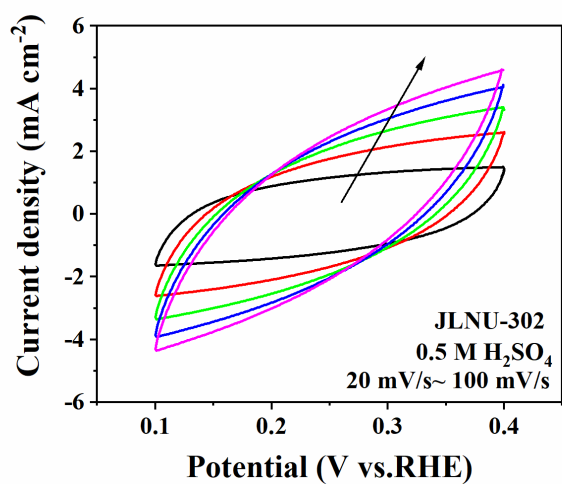

Figure S36. CV curves of JLNU-302 at different scan rates.

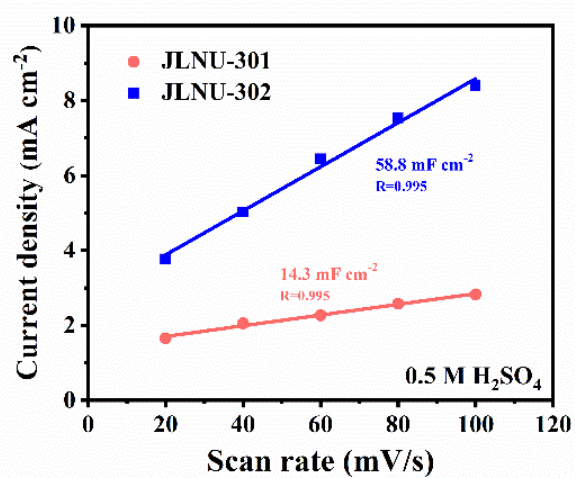

Figure S37. The  $C_{dl}$  plots for JLNU-301, and JLNU-302 at 0.5 M  $H_2SO_4$ .

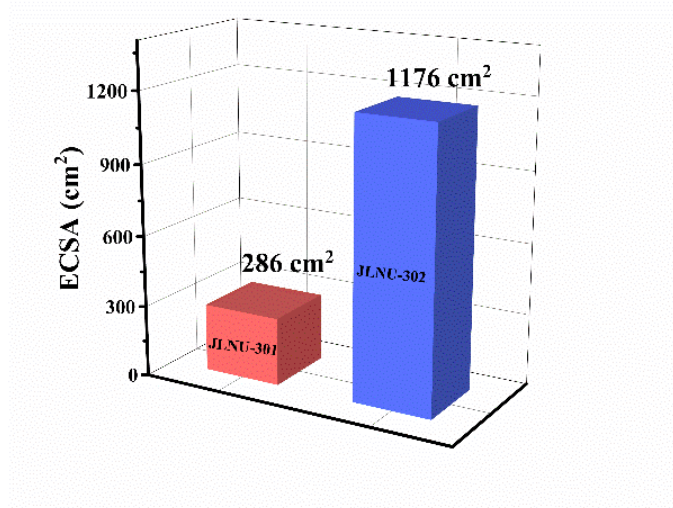

Figure S38. The ECSA plots for JLNU-301, and JLNU-302 at 0.5 M H<sub>2</sub>SO<sub>4</sub>.

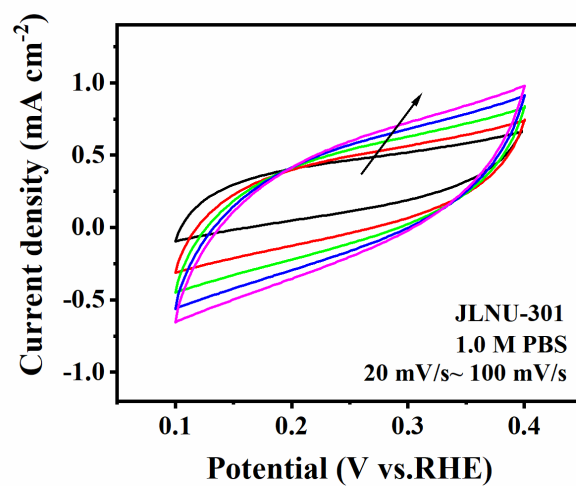

Figure S39. CV curves of JLNU-301 at different scan rates.

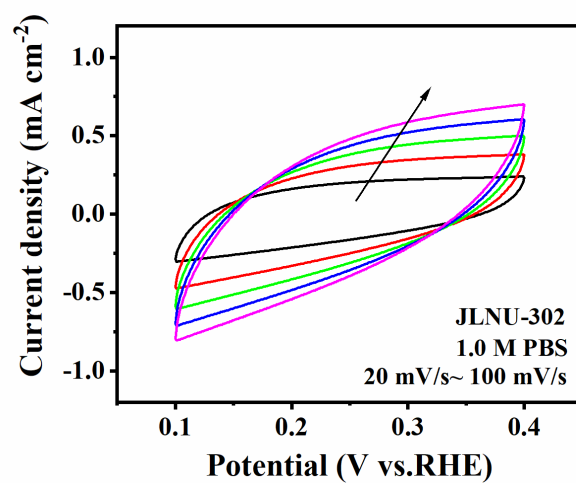

Figure S40. CV curves of JLNU-302 at different scan rates.

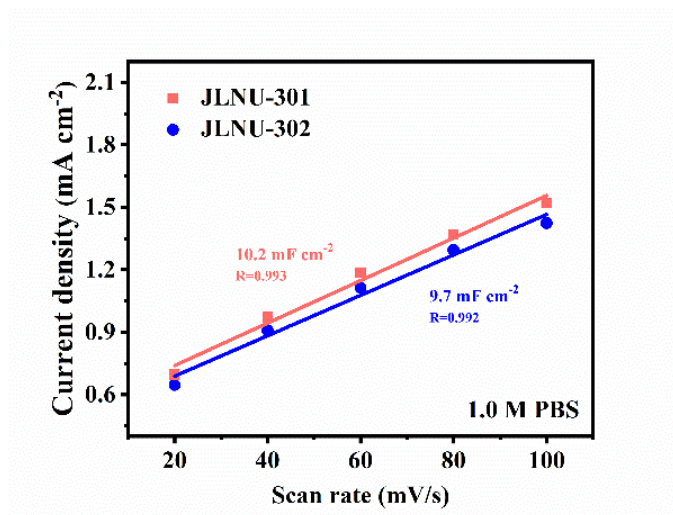

Figure S41. The  $C_{dl}$  plots for JLNU-301, and JLNU-302 at 1.0 M PBS.

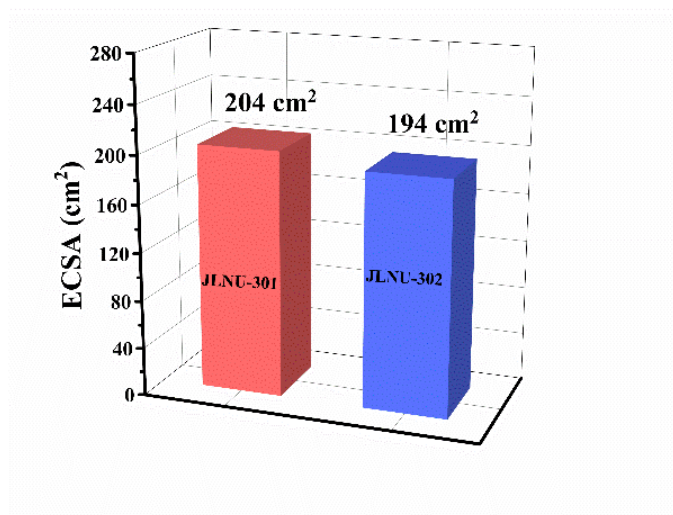

Figure S42. The ECSA plots for JLNU-301, and JLNU-302 at 1.0 M PBS.

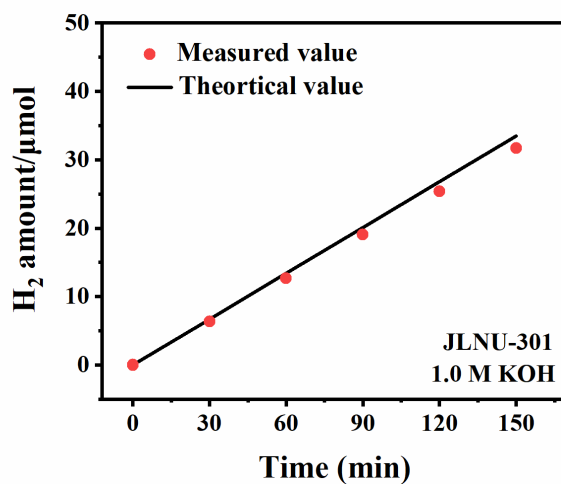

Figure S43. The Faraday efficiency for JLNU-301 in 1.0 M KOH.



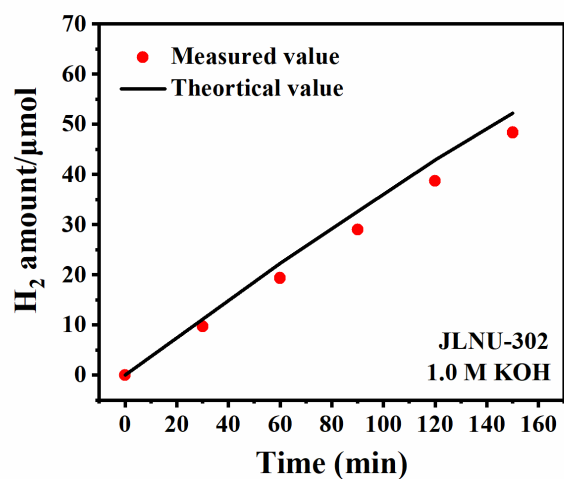

Figure S44. The Faraday efficiency for JLNU-302 in 1.0 M KOH.

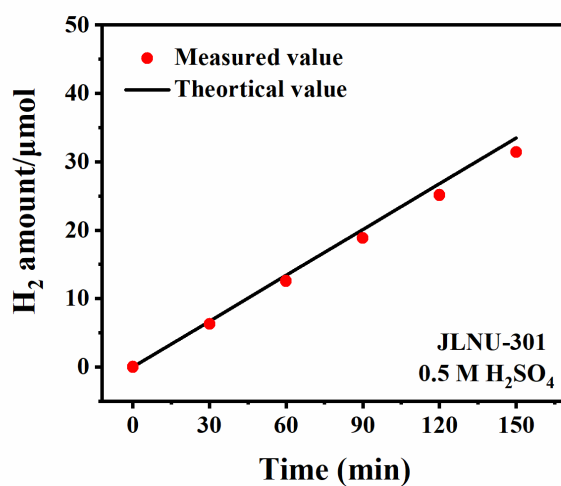

Figure S45. The Faraday efficiency for JLNU-301 in 0.5 M H<sub>2</sub>SO<sub>4</sub>.

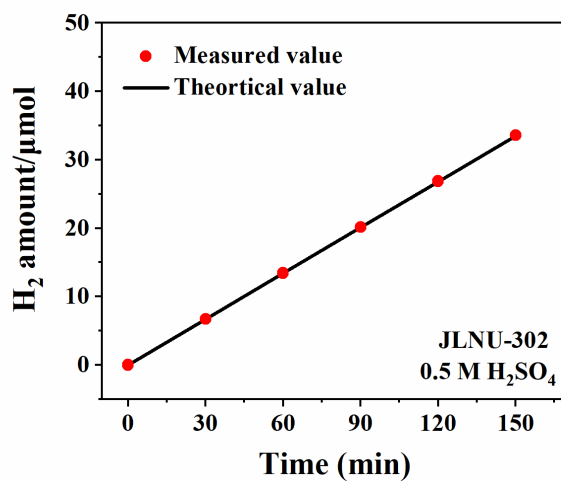

Figure S46. The Faraday efficiency for JLNU-302 in 0.5 M H<sub>2</sub>SO<sub>4</sub>.



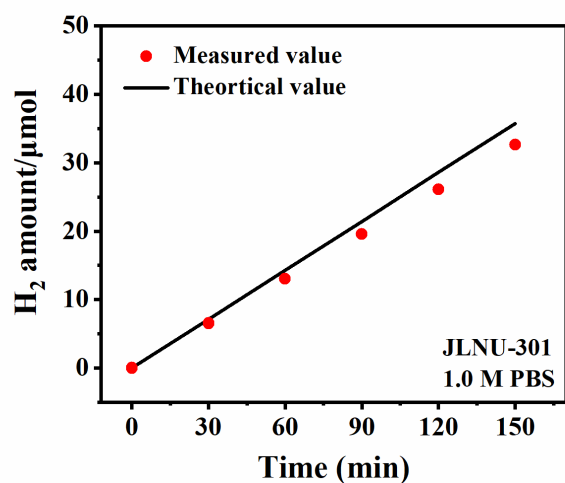

Figure S47. The Faraday efficiency for JLNU-302 in 1.0 M PBS.

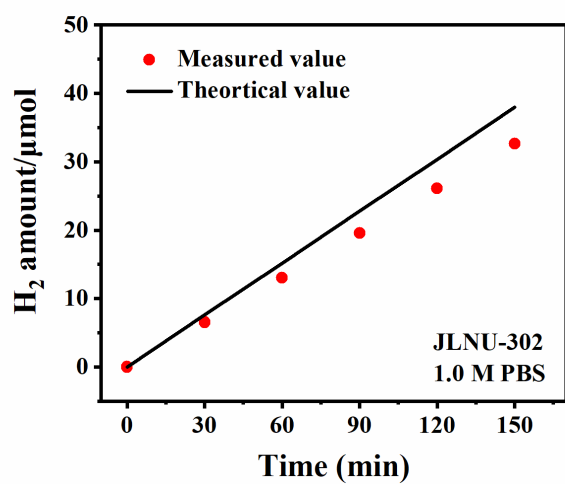

Figure S48. The Faraday efficiency for JLNU-302 in 1.0 M PBS

## Section S8: Unit cell parameters and fractional atomic coordinates

**Table S1.** Unit cell parameters and fractional atomic coordinates for JLNU-301 calculated on the basis of staggered **hcb** net.

|                      |         |                                                                                      |   |
|----------------------|---------|--------------------------------------------------------------------------------------|---|
| Space group          |         | <i>P6/M</i> (No. 175)                                                                |   |
| Calculated unit cell |         | a = b = 39.9400 Å, c = 3.4967 Å,<br>$\alpha = \beta = 90^\circ$ $\gamma = 120^\circ$ |   |
| Measured unit cell   |         | a = b = 38.9714 Å, c = 3.4973 Å,<br>$\alpha = \beta = 90^\circ$ $\gamma = 120^\circ$ |   |
| Pawley refinement    |         | $R_{\text{wp}} = 2.70\%$ and $R_p = 1.87\%$                                          |   |
| Atom                 | x       | y                                                                                    | z |
| C1                   | 0.3551  | 0.6489                                                                               | 1 |
| N2                   | 0.37265 | 0.68831                                                                              | 1 |
| C3                   | 0.37864 | 0.62968                                                                              | 1 |
| C4                   | 0.41934 | 0.65185                                                                              | 1 |
| C5                   | 0.44169 | 0.63365                                                                              | 1 |
| C6                   | 0.42369 | 0.5931                                                                               | 1 |
| C7                   | 0.38292 | 0.57081                                                                              | 1 |
| C8                   | 0.3606  | 0.58902                                                                              | 1 |
| N9                   | 0.44741 | 0.57536                                                                              | 1 |
| C10                  | 0.43319 | 0.53804                                                                              | 1 |
| C11                  | 0.45859 | 0.52116                                                                              | 1 |
| C12                  | 0.499   | 0.54352                                                                              | 1 |
| C13                  | 0.48635 | 0.48112                                                                              | 1 |
| S14                  | 0.43964 | 0.47144                                                                              | 1 |
| H15                  | 0.43419 | 0.68493                                                                              | 1 |
| H16                  | 0.47477 | 0.65188                                                                              | 1 |
| H17                  | 0.36792 | 0.53772                                                                              | 1 |
| H18                  | 0.32751 | 0.5708                                                                               | 1 |
| H19                  | 0.40028 | 0.51826                                                                              | 1 |
| H20                  | 0.51378 | 0.5766                                                                               | 1 |

**Table S2.** Unit cell parameters and fractional atomic coordinates for JLNU-302 calculated on the basis of staggered **hcb** net.

|                      |  |                                                                                      |  |
|----------------------|--|--------------------------------------------------------------------------------------|--|
| Space group          |  | <i>P6/M</i> (No. 175)                                                                |  |
| Calculated unit cell |  | a = b = 39.7190 Å, c = 3.5506 Å,<br>$\alpha = \beta = 90^\circ$ $\gamma = 120^\circ$ |  |
| Measured unit cell   |  | a = b = 38.9714 Å, c = 3.4973 Å,<br>$\alpha = \beta = 90^\circ$ $\gamma = 120^\circ$ |  |
| Pawley refinement    |  | $R_{\text{wp}} = 1.13\%$ and $R_p = 0.85\%$                                          |  |

| Atom | x       | y       | z |
|------|---------|---------|---|
| C1   | 0.50575 | 0.48649 | 1 |
| C2   | 0.48175 | 0.45002 | 1 |
| C3   | 0.49915 | 0.43058 | 1 |
| C4   | 0.53592 | 0.45289 | 1 |
| C5   | 0.56149 | 0.43981 | 1 |
| N6   | 0.5506  | 0.40574 | 1 |
| C7   | 0.57464 | 0.39178 | 1 |
| C8   | 0.56038 | 0.35457 | 1 |
| C9   | 0.58314 | 0.34011 | 1 |
| C10  | 0.62052 | 0.36272 | 1 |
| C11  | 0.63482 | 0.40003 | 1 |
| C12  | 0.61208 | 0.41451 | 1 |
| C13  | 0.6445  | 0.34745 | 1 |
| N14  | 0.68071 | 0.36943 | 1 |
| S15  | 0.45002 | 0.50233 | 1 |
| H16  | 0.45114 | 0.43556 | 1 |
| H17  | 0.483   | 0.39998 | 1 |
| H18  | 0.59159 | 0.45972 | 1 |
| H19  | 0.53001 | 0.336   | 1 |
| H20  | 0.57134 | 0.30975 | 1 |
| H21  | 0.66516 | 0.41875 | 1 |
| H22  | 0.62389 | 0.44488 | 1 |

## Section S9: Comparison of HER performance with other electrocatalyst.

**Table S3.** Comparison of HER performance of JLNU-COFs with other electrocatalyst.

| Catalyst                                  | Overpotential<br>10 mA cm <sup>-2</sup> (mV) |                                                |                      | Reference        |
|-------------------------------------------|----------------------------------------------|------------------------------------------------|----------------------|------------------|
|                                           | Alkaline<br>1.0 M KOH                        | Acidic<br>0.5 M H <sub>2</sub> SO <sub>4</sub> | Netural<br>1.0 M PBS |                  |
| JLNU-301                                  | 136                                          | 189                                            | 282                  | <b>This work</b> |
| JLNU-302                                  | 91                                           | 151                                            | 320                  | <b>This work</b> |
| FeS/Fe <sub>3</sub> C@N-S-C-800           | 446                                          | 174                                            | 798<br>(0.1 M PBS)   | 5                |
| C-Fe,Co-COF                               | 330                                          | 280                                            | 280                  | 6                |
| 12%Ni@TPP-CB[6]                           | —                                            | 250                                            | —                    | 7                |
| SB-PORPy                                  | —                                            | 380<br>(5 mA cm <sup>-2</sup> )                | —                    | 8                |
| Fe <sub>2</sub> P@Fe <sub>4</sub> N@C-800 | —                                            | 232                                            | —                    | 9                |
| TpPAM                                     | —                                            | 250                                            | —                    | 10               |
| FeTPP@NiTPP/NF                            | 170                                          | —                                              | —                    | 11               |
| TiCP-PCP                                  | —                                            | 142                                            | —                    | 12               |
| N-HCNF-2-1000                             | —                                            | 243                                            | —                    | 13               |
| 1"-NP                                     | —                                            | 260<br>(1.0 M HClO <sub>4</sub> )              | —                    | 14               |
| CTF@MoS <sub>2</sub> -5                   | —                                            | 93                                             | —                    | 15               |
| TQ-CMP                                    | —                                            | 170                                            | —                    | 16               |
| CoCOP                                     | —                                            | 121                                            | —                    | 17               |
| Pt@CTF-1                                  | —                                            | 111                                            | —                    | 18               |
| BPT-COF                                   | —                                            | 142                                            | —                    | 19               |
| CoP-2ph-CMP-800                           | 360                                          | —                                              | —                    | 20               |
| NiCoFeP/C                                 | 149                                          | —                                              | —                    | 21               |
| Ni@NC <sub>6</sub> -600                   | 180                                          | —                                              | —                    | 22               |

## Section S10. References

- [1] E. Skúlason, V. Tripkovic, M. E. Björketun, S. Gudmundsdóttir, G. Karlberg, J. Rossmeisl, T. Bligaard, H. Jónsson and J. K. Nørskov, *J. Phys. Chem. C*, **2010**, 114, 18182-18197.
- [2] M. Chhetri, S. Maitra, H. Chakraborty, U. V. Waghmare, C. N. R. Rao, *Energy Environ. Sci.* **2016**, 9, 95-101.
- [3] W. Sheng, A. Bivens M. Myint, Z. Zhuang, R. Forest, Q. Fang, J. Chen, Y. Yan, *Energy Environ. Sci.* **2014**, 7, 1719-1724.
- [4] F. Rosalbino, S. Delsante, G. Borzone, E. Angelini, *Int. J. Hydrogen Energy* **2008**, 33, 6696-6703.
- [5] T. Kong, X. Fan, A. Kong, Z. Zhou, X. Zhang, Y. Shan, *Adv. Funct. Mater.* **2018**, 28, 1803973.
- [6] D. Wu, Q. Xu, J. Qian, X. Li, Y. Sun. *Chem. Eur. J.* **2019**, 25, 3105-3111.
- [7] A. Khaligh, Y. Sheidaei, D. Tuncel, *ACS Appl. Energy Mater.* **2021**, 4, 3535-3543.
- [8] S. Bhunia, S. K. Das, R. Jana, S. C. Peter, S. Bhattacharya, M. Addicoat, A. Bhaumik, A. Pradhan, *ACS Appl. Mater. Interfaces.* **2017**, 9, 23843-23851.
- [9] X. Fan, F. Kong, A. Kong, A. Chen, Z. Zhou, Y. Shan, *ACS Appl. Mater. Interfaces*, **2017**, 9, 32840-32850.
- [10] B. C. Patra, S. Khilari, R. N. Manna, S. Mondal, D. Pradhan, A. Pradhan, A. Bhaumilk, *ACS Catal.* **2017**, 7, 6120-6127.
- [11] S. Yuan, L. Cui, X. He, W. Zhang, T. Asefa, *Int. J. Hydrog.* **2020**, 45, 28860-28869.
- [12] A. Wang, L. Cheng, X. Shen, W. Zhu, L. Li, *Dyes Pigm.* **2020**, 181, 108568.
- [13] Y. Zheng, S. Chen, H. Song, H. Guo, K. A. I. Zhang, C. Zhang, T. Liu, *Nanoscale* **2020**, 12, 14441-14447.
- [14] C. Yang, S. Tao, N. Huang, X. Zhang, J. Duan, R. Makiura, S. Maenosono, *ACS Appl. Nano Mater.* **2020**, 3, 5481-5488.
- [15] S. Qiao, B. Zhang, Q. Li, Z. Li, W. Wang, J. Zhao, X. Zhang, Y. Hu, *ChemSusChem.* **2019**, 12, 5032-5040.
- [16] W. Wang, Y. Zhang, L. Chen, H. Chen, S. Hu, Q. Li, H. Liu, S. Qiao, *Polym. Chem.* **2021**, 12, 650-659.

- [17] A. Wang, L. Cheng, W. Zhao, X. Shen, W. Zhu, *J. Colloid Interface Sci.* **2020**, 579, 598-606.
- [18] M. Siebels, C. Schlüsener, J. Thomas, Y. Xiao, X. Yang and C. Janiak, *J. Mater. Chem. A*, **2019**, 7, 11934-11943.
- [19] J. Chen, Y. Bai, Y. Liu, M. Liu, X. Wang, S. Shang, W. Gao, C. Du, Y. Qiao, J. Dong, Y. Liu, *Angew. Chem. Int. Ed.* **2021**, doi.org/10.1002/anie.202113067.
- [20] H. Jia, Y. Yao, Y. Gao, D. Lu and P. Du, *Chem. Commun.* **2016**, 52, 13483-13486.
- [21] X. Wei, Y. Zhang, H. He, L. Peng, S. Xiao, S. Yao, P. Xiao, *Chem. Commun.* **2019**, 55, 10896-10899.
- [22] N. Cheng, N. Wang, L. Ren, G. Casillas-Garcia, N. Liu, Y. Liu, X. Xu, W. Hao, S. X. Dou, Y. Du, *Carbon*, **2020**, 163, 178-185.
